# Supplementary material for: Overexpression of Interleukin-8 Promotes the Progression of Fatty Liver to Nonalcoholic Steatohepatitis in Mice
Source: MDPI journal article supplement (doi:10.3390/ijms242015489), 2023-10-23
Supplement: s1 [file s1]

**Supplementary Table S1. Formula for a high-fat diet (D12492, rodent diet with 60% kcal% fat)**

| <b>Ingredient</b> | <b>Gram%</b> | <b>Kcal%</b> |
|-------------------|--------------|--------------|
| Protein           | 26.2         | 20           |
| Carbohydrate      | 26.3         | 20           |
| Fat               | 34.9         | 60           |

| <b>Ingredient</b>                     | <b>Gram</b>   | <b>Kcal</b> |
|---------------------------------------|---------------|-------------|
| Casein                                | 200           | 800         |
| L-Cystine                             | 3             | 12          |
| Corn Starch                           | 0             | 0           |
| Maltodextrin 10                       | 125           | 500         |
| Sucrose                               | 68.8          | 275.2       |
| Cellulose, BW200                      | 50            | 0           |
| Soybean Oil                           | 25            | 225         |
| Lard                                  | 245           | 2205        |
| Mineral Mix, S10026                   | 10            | 0           |
| DiCalcium Phosphate                   | 13            | 0           |
| Calcium Carbonate                     | 5.5           | 0           |
| Potassium Citrate, 1 H <sub>2</sub> O | 16.5          | 0           |
| Vitamin Mix, V10001                   | 10            | 40          |
| Choline Bitartrate                    | 2             | 0           |
| FD&C Blue Dye #1                      | 0.05          | 0           |
| <b>Total</b>                          | <b>773.85</b> | <b>4057</b> |

**Supplementary Table S2. The concentration of antibodies used for immunohistochemistry and immunoblot.**

| <b>Target Protein</b> | <b>Purpose</b>       | <b>Dilution Ratio</b> |
|-----------------------|----------------------|-----------------------|
| MPO                   | Immunohistochemistry | Ready-to-use          |
| Ly6g                  | Immunohistochemistry | 1:300                 |
| MDA                   | Immunohistochemistry | 1:400                 |
| 4-HNE                 | Immunohistochemistry | 1:400                 |
| F4/80                 | Immunohistochemistry | 1:400                 |
| a-SMA                 | Immunohistochemistry | 1:400                 |
| p-p38                 | Immunoblot           | 1:1000                |
| P38                   | Immunoblot           | 1:1000                |
| p-JNK                 | Immunoblot           | 1:1000                |
| JNK                   | Immunoblot           | 1:1000                |
| Actin                 | Immunoblot           | 1:1000                |
